# Supplementary material for: Characterizing the blood microbiota of omnivorous and frugivorous bats (Chiroptera: Phyllostomidae) in Casanare, eastern Colombia
Source: PeerJ. 2023 Jul 6;11:e15169. doi: 10.7717/peerj.15169 (PMC10329821; doi:10.7717/peerj.15169)
Supplement: Supplemental Information 6 [file peerj-11-15169-s006.xlsx]

## Sheet: Supplemental Table S1
	Supplemental Table S1. Information associated with each of the blood samples collected in different localities of the department of Casanare.
	ID	Sex	Site	W	N	Specie	City	Diet	ENA Accession number
	MT10Cp	NA	Cruz Verde (Tamara)	-72.1002	5.48216	Carollia perspicillata	Tamara	Frugivorous	ERR9880210
	MT111Cp	Female	Cueva guacharos (Aguazul)	-72.5763	5.2085	Carollia perspicillata	Aguazul	Frugivorous	ERR9880209
	MT120Cp	Male	Cueva guacharos (Aguazul)	-72.5763	5.2085	Carollia perspicillata	Aguazul	Frugivorous	ERR9880208
	MT126Cb	Male	Cueva guacharos (Aguazul)	-72.5763	5.2085	Carollia brevicauda	Aguazul	Frugivorous	ERR9880207
	MT12Cp	NA	Cruz Verde (Tamara)	-72.1002	5.48216	Carollia perspicillata	Tamara	Frugivorous	ERR9880206
	MT137Cb	Female	La Graciela (Aguazul)	-72.4599	4.87288	Carollia brevicauda	Aguazul	Frugivorous	ERR9880205
	MT151Cb	Male	La Graciela (Aguazul)	-72.4599	4.87288	Carollia brevicauda	Aguazul	Frugivorous	ERR9880204
	MT154Cp	Male	La Graciela (Aguazul)	-72.4599	4.87288	Carollia brevicauda	Aguazul	Frugivorous	ERR9880203
	MT27Cp	NA	San Isidro (Pore)	-72.0535	5.65832	Carollia perspicillata	Pore	Frugivorous	ERR9880202
	MT43Ph	Male	La niata (yopal)	-72.3096	5.40727	Phyllostomus hastatus	Yopal	Omnivorous	ERR9880201
	MT44Ph	Male	La niata (yopal)	-72.3096	5.40727	Phyllostomus hastatus	Yopal	Omnivorous	ERR9880200
	MT45Ph	Male	La niata (yopal)	-72.3096	5.40727	Phyllostomus hastatus	Pore	Omnivorous	ERR9880199
	MT46Ph	Male	La niata (yopal)	-72.3096	5.40727	Phyllostomus hastatus	Yopal	Omnivorous	ERR9880198
	MT48Ph	Male	La niata (yopal)	-72.3096	5.40727	Phyllostomus hastatus	Yopal	Omnivorous	ERR9880197
	MT49Ph	Male	La niata (yopal)	-72.3096	5.40727	Phyllostomus hastatus	Yopal	Omnivorous	ERR9880196
	MT50Ph	Male	La niata (yopal)	-72.3096	5.40727	Phyllostomus hastatus	Yopal	Omnivorous	ERR9880195
	MT52Ph	Male	La niata (yopal)	-72.3096	5.40727	Phyllostomus hastatus	Yopal	Omnivorous	ERR9880194
	MT53Ph	Male	La niata (yopal)	-72.3096	5.40727	Phyllostomus hastatus	Yopal	Omnivorous	ERR9880193
	MT54Ph	Male	La niata (yopal)	-72.3096	5.40727	Phyllostomus hastatus	Yopal	Omnivorous	ERR9880192
	MT55_2Ph	Male	La niata (yopal)	-72.3096	5.40727	Phyllostomus hastatus	Yopal	Omnivorous	ERR9880191
	MT56Ph	Male	La niata (yopal)	-72.3096	5.40727	Phyllostomus hastatus	Pore	Omnivorous	ERR9880190
	MT63Ph	Female	San Isidro (Pore)	-72.0535	5.65832	Phyllostomus hastatus	Pore	Omnivorous	ERR9880189
	MT80Ph	Male	Curama (pore)	-72.0403	5.70313	Phyllostomus hastatus	Pore	Omnivorous	ERR9880188
	MT81Pe	Male	Curama (pore)	-72.0403	5.70313	Phyllostomus elongatus	Pore	Omnivorous	ERR9880187
	MT87Ph	Male	Ramon Nonato (Pore)	-72.0883	5.66753	Phyllostomus elongatus	Pore	Omnivorous	ERR9880186
