# Supplementary material for: Characterizing the blood microbiota of omnivorous and frugivorous bats (Chiroptera: Phyllostomidae) in Casanare, eastern Colombia
Source: PeerJ. 2023 Jul 6;11:e15169. doi: 10.7717/peerj.15169 (PMC10329821; doi:10.7717/peerj.15169)
Supplement: Supplemental Information 7 [file peerj-11-15169-s007.xlsx]

## Sheet: Supplemental Table S2
	Supplemental Table S2. Count and length of reads obtained by amplicon-based sequencing.
	ID	Species	Reads	Sequence length (bp)	Quality score
	MT10Cp	Carollia perspicillata	126178	224-225	34
	MT111Cp	Carollia perspicillata	126815	224-226	31
	MT120Cp	Carollia perspicillata	100556	224-227	32
	MT126Cb	Carollia brevicauda	146348	224-228	33
	MT12Cp	Carollia perspicillata	91195	224-229	31
	MT137Cb	Carollia brevicauda	128637	224-230	34
	MT151Cb	Carollia brevicauda	127195	224-231	31
	MT154Cp	Carollia brevicauda	134537	224-232	32
	MT27Cp	Carollia perspicillata	98086	224-233	35
	MT43Ph	Phyllostomus hastatus	130381	224-234	35
	MT44Ph	Phyllostomus hastatus	144653	217-225	30
	MT45Ph	Phyllostomus hastatus	162992	223-225	33
	MT46Ph	Phyllostomus hastatus	137707	216-225	30
	MT48Ph	Phyllostomus hastatus	114793	223-225	31
	MT49Ph	Phyllostomus hastatus	95341	224-225	31
	MT50Ph	Phyllostomus hastatus	141665	223-225	32
	MT52Ph	Phyllostomus hastatus	123933	223-225	31
	MT53Ph	Phyllostomus hastatus	143502	217-225	35
	MT54Ph	Phyllostomus hastatus	105634	223-225	35
	MT55_2Ph	Phyllostomus hastatus	173936	223-225	31
	MT56Ph	Phyllostomus hastatus	174776	223-225	35
	MT63Ph	Phyllostomus hastatus	133037	216-225	33
	MT80Ph	Phyllostomus hastatus	119423	224-225	31
	MT81Pe	Phyllostomus elongatus	139756	224-225	32
	MT87Ph	Phyllostomus elongatus	86397	223-225	30
