# Supplementary material for: Characterizing the blood microbiota of omnivorous and frugivorous bats (Chiroptera: Phyllostomidae) in Casanare, eastern Colombia
Source: PeerJ. 2023 Jul 6;11:e15169. doi: 10.7717/peerj.15169 (PMC10329821; doi:10.7717/peerj.15169)
Supplement: Supplemental Information 8 [file peerj-11-15169-s008.xlsx]

## Sheet: Supplemental Table S3
	Supplemental Table S3. Count of the number of reads, ASVs, phyla and genus found in archaea and bacteria.
	Kindom	Number of reads	Number of ASVs	Number of phyla	Number of genus
	Archea	5419	145	3	5
	Bacteria	2612732	9640	48	956
