# Supplementary material for: Characterizing the blood microbiota of omnivorous and frugivorous bats (Chiroptera: Phyllostomidae) in Casanare, eastern Colombia
Source: PeerJ. 2023 Jul 6;11:e15169. doi: 10.7717/peerj.15169 (PMC10329821; doi:10.7717/peerj.15169)
Supplement: Supplemental Information 9 — Each species was identified by BLAST with an identity percentage of 97%. [file peerj-11-15169-s009.xlsx]

## Sheet: Supplemental Table S4
	Supplemental Table S4. Relative abundances of the species of the differential genera from dietary habits of bats. Each species was identified by BLAST with an identity percentage of 97%
	Species	Diet	Relative abundance
	Acinetobacter albensis	Frugivorous	0.0001258
		Omnivorous	4.65104e-05
	Acinetobacter baumannii	Frugivorous	8.76019e-05
		Omnivorous	3.40899e-05
	Acinetobacter beijerinckii	Frugivorous	0.00275311
		Omnivorous	0.000531828
	Acinetobacter bouvetii	Frugivorous	0.00133487
		Omnivorous	0.000283216
	Acinetobacter brisouii	Omnivorous	2.17011e-05
		Frugivorous	0
	Acinetobacter calcoaceticus	Omnivorous	7.216e-05
		Frugivorous	3.74416e-05
	Acinetobacter celticus	Frugivorous	9.00244e-05
		Omnivorous	0
	Acinetobacter colistiniresistens	Frugivorous	0.0326949
		Omnivorous	0.00679708
	Acinetobacter indicus	Frugivorous	3.76785e-05
		Omnivorous	1.76257e-06
	Acinetobacter johnsonii	Frugivorous	0.00236759
		Omnivorous	0.000637004
	Acinetobacter lwoffii	Frugivorous	0.00183757
		Omnivorous	0.000306956
	Acinetobacter movaspgherensis	Omnivorous	0.000118895
		Frugivorous	0
	Acinetobacter piscicola	Omnivorous	2.58484e-05
		Frugivorous	0
	Acinetobacter schindleri	Frugivorous	0.000754472
		Omnivorous	0.000312238
	Acinetobacter seohaensis	Frugivorous	0.00177562
		Omnivorous	0.00114636
	Acinetobacter sp	Omnivorous	1.54301e-05
		Frugivorous	9.35604e-06
	Acinetobacter ursingii	Omnivorous	3.00067e-06
		Frugivorous	0
	Acinetobacter variabilis	Omnivorous	3.64791e-05
		Frugivorous	0
	Acinetobacter venetianus	Frugivorous	0.000657135
		Omnivorous	4.25702e-05
	Bartonella alsatica	Omnivorous	0.0380051
		Frugivorous	0.00143669
	Bartonella australis	Frugivorous	0.0973004
		Omnivorous	0.0474255
	Bartonella birtlesii	Omnivorous	0.000411347
		Frugivorous	4.84437e-05
	Bartonella chomelii	Omnivorous	0.00175922
		Frugivorous	0.00169655
	Bartonella clarridgeiae	Frugivorous	0.0400018
		Omnivorous	0.00199178
	Bartonella coopersplainsensis	Frugivorous	0.00322723
		Omnivorous	0.000136842
	Bartonella elizabethae	Omnivorous	0.0159442
		Frugivorous	0.00169818
	Bartonella jaculi	Frugivorous	8.30512e-05
		Omnivorous	2.53717e-05
	Bartonella senegalensis	Frugivorous	0.097944
		Omnivorous	0.00271447
	Bartonella sp	Omnivorous	0.00886573
		Frugivorous	0.00068749
	Bartonella vinsonii	Frugivorous	0.0667763
		Omnivorous	0.0031848
	Cloacibacterium haliotis	Omnivorous	1.73853e-05
		Frugivorous	0
	Cloacibacterium rupense	Frugivorous	0.0343551
		Omnivorous	0.00730261
	Cloacibacterium sp	Frugivorous	5.08107e-06
		Omnivorous	0
	Gemella sanguinis	Omnivorous	0.0799453
		Frugivorous	0.00119337
	Gemella sp	Omnivorous	6.12097e-05
		Frugivorous	0
	Mannheimia varigena	Frugivorous	0.0839087
		Omnivorous	0.000965325
	Mycoplasma arginini	Omnivorous	9.18476e-06
		Frugivorous	0
	Mycoplasma lagogenitalium	Omnivorous	0.000127943
		Frugivorous	2.44507e-06
	Mycoplasma penetrans	Frugivorous	9.48172e-06
		Omnivorous	0
	Mycoplasma sp	Omnivorous	0.430929
		Frugivorous	0.00636914
